# Supplementary material
Source: publisher figshare collection journal article supplement (https://acs.figshare.com/ndownloader/files/25587612)
Supplement: Supplementary file 1 [file 25587612]

# Supporting Information

## **Design and Synthesis of a Single-Layer Ferromagnetic Metal-Organic Framework with Topological Non-Trivial Gaps**

*Zi'Ang Gao,<sup>1</sup> Yifan Gao,<sup>1,2</sup> Muqing Hua,<sup>1</sup> Jing Liu,<sup>1</sup> Li Huang<sup>2</sup> and Nian Lin<sup>1\*</sup>*

<sup>1</sup>Department of Physics, The Hong Kong University of Science and Technology,  
Hong Kong SAR, China

<sup>2</sup>Department of Physics, Southern University of Science and Technology, Shenzhen,  
Guangdong 518055, China

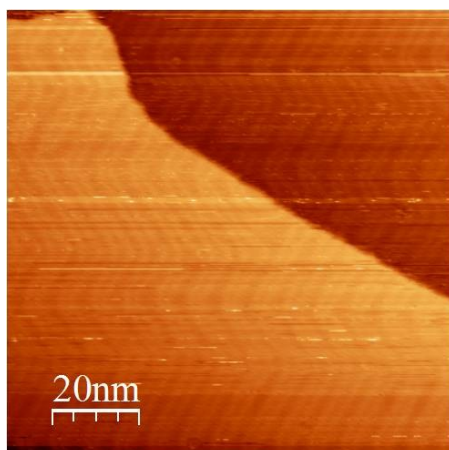

Fig. S1 STM Image showing fuzzy features of HATP molecules on Au(111) before deposition of Fe.

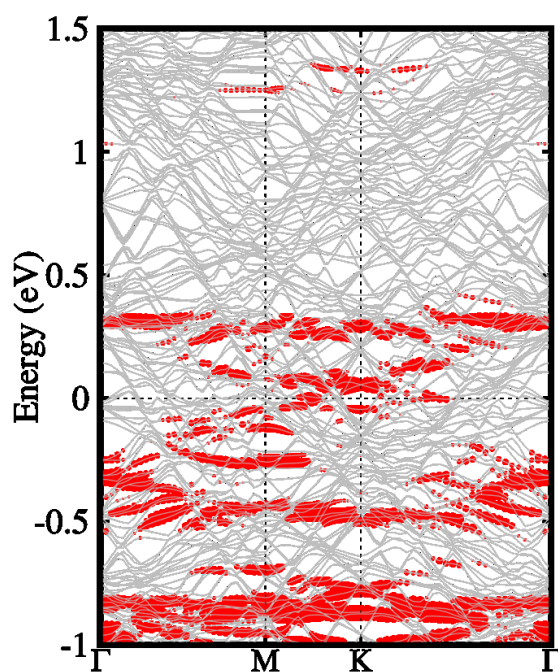

Fig. S2 Band structure contribution of the C and N atoms in the  $\text{Fe}_3(\text{HITP})_2$  on the Au(111) slab.

Table S1. Total energy difference between FIM/AFM and FM phases calculated with different  $U_{\text{eff}}$

| $U_{\text{eff}}$ (eV)                | 1        | 2        | 3        | 4        | 5        |
|--------------------------------------|----------|----------|----------|----------|----------|
| $E_{\text{FIM}}-E_{\text{FM}}$ (meV) | 34.76624 | 41.8264  | 49.21074 | 52.45611 | 60.89205 |
| $E_{\text{AFM}}-E_{\text{FM}}$ (meV) | 39.05773 | 46.37943 | 54.21138 | 58.0019  | 67.1862  |
